# Supplementary material for: Respiratory tract clinical sample selection for microbiota analysis in patients with pulmonary tuberculosis
Source: PubMed Central journal article supplement (PMC4164332; doi:10.1186/2049-2618-2-29), 2014-08-25
Supplement: 2049-2618-2-29-S1.pdf [file 2049-2618-2-29-S1.pdf]

### Additional File 1. Definition of groups and inclusion and exclusion criteria

|                           | <b>Patient with Tuberculosis</b>                                                                                                                                                                                                                                                                                                                                                                                                                                                                    | <b>Healthy Control</b>                                                                                                                                                                                                                                                                                                                                                                                                                                                                                                                                                                                                                                                                                                                                                                                                                                                                                                                                  |
|---------------------------|-----------------------------------------------------------------------------------------------------------------------------------------------------------------------------------------------------------------------------------------------------------------------------------------------------------------------------------------------------------------------------------------------------------------------------------------------------------------------------------------------------|---------------------------------------------------------------------------------------------------------------------------------------------------------------------------------------------------------------------------------------------------------------------------------------------------------------------------------------------------------------------------------------------------------------------------------------------------------------------------------------------------------------------------------------------------------------------------------------------------------------------------------------------------------------------------------------------------------------------------------------------------------------------------------------------------------------------------------------------------------------------------------------------------------------------------------------------------------|
| <b>Definition</b>         | Patients consulting in the city of Medellin with clinical symptoms of tuberculosis and no previous history of the disease, they were smear-positive and were not receiving antibiotic treatment.                                                                                                                                                                                                                                                                                                    | People in good health, free of respiratory symptoms, and who had no contact with patients diagnosed with TB.                                                                                                                                                                                                                                                                                                                                                                                                                                                                                                                                                                                                                                                                                                                                                                                                                                            |
| <b>Inclusion criteria</b> | <ul style="list-style-type: none"> <li>- Persons 18 years of age and older</li> <li>- Either gender (Man or woman)</li> <li>- Diagnosed with TB for the first time</li> <li>- Smear positive acid-fast bacilli</li> <li>- Culture positive for <i>M. tuberculosis</i></li> <li>- Negative serology for HIV</li> </ul>                                                                                                                                                                               | <ul style="list-style-type: none"> <li>- Persons 18 years of age and older</li> <li>- Either gender (Man or woman)</li> <li>- No prior or current contact with documented TB patient</li> <li>- Negative serology for HIV</li> <li>- Negative response to the PPD test</li> <li>- Matched with TB patients in age (<math>\pm 5</math> years) and gender</li> </ul>                                                                                                                                                                                                                                                                                                                                                                                                                                                                                                                                                                                      |
| <b>Exclusion criteria</b> | <ul style="list-style-type: none"> <li>- Pregnant women</li> <li>- Previous TB diagnosis at any time</li> <li>- Current or prior treatment for TB</li> <li>- Any type of antibiotic treatment in the last 4 weeks</li> <li>- Diagnosis of cancer</li> <li>- Transplant patients</li> <li>- Diagnosis of cystic fibrosis</li> <li>- Diagnosis of pulmonary disease such as COPD</li> <li>- Diagnosis of autoimmune disease.</li> <li>- Current treatment with immunosuppressive therapies</li> </ul> | <ul style="list-style-type: none"> <li>- Pregnant women</li> <li>- Previous TB diagnosis at any time</li> <li>- Current clinical symptoms suggestive of tuberculosis or any respiratory disease</li> <li>- Prior treatment for TB</li> <li>- Respiratory symptoms or diagnosis of any respiratory diseases other than tuberculosis in the past 4 weeks: tonsillitis, pharyngitis, otitis, epiglottitis, pneumonia, bronchitis, Pneumonitis, COPD.</li> <li>- Any type of antibiotic treatment in the last 4 weeks</li> <li>- Previous or current contact with TB disease patients</li> <li>- Be a health worker in contact with TB patients or suspected of having TB.</li> <li>- Diagnosis of cancer</li> <li>- Transplant patients</li> <li>- Diagnosis of cystic fibrosis</li> <li>- Diagnosis of pulmonary disease such as COPD</li> <li>- Diagnosis of autoimmune disease</li> <li>- Current treatment with immunosuppressive therapies</li> </ul> |
